# Supplementary material
Source: HighWire-hosted journal article supplement (http://dmd.aspetjournals.org/highwire/filestream/70969/field_highwire_adjunct_files/0/Supplemental_79400.pdf)
Supplement: Supplemental_79400.pdf [file Supplemental_79400.pdf]

## Supplemental File

**Article Title:** Identification of structural elements involved in the transport of 3'-deoxy-nucleoside analogs by human equilibrative nucleoside transporter 3

**Authors:** MD Fazlur Rahman, Radhika Raj, and Rajgopal Govindarajan

**Journal Title:** Drug Metabolism and Disposition (DMD # 79400)

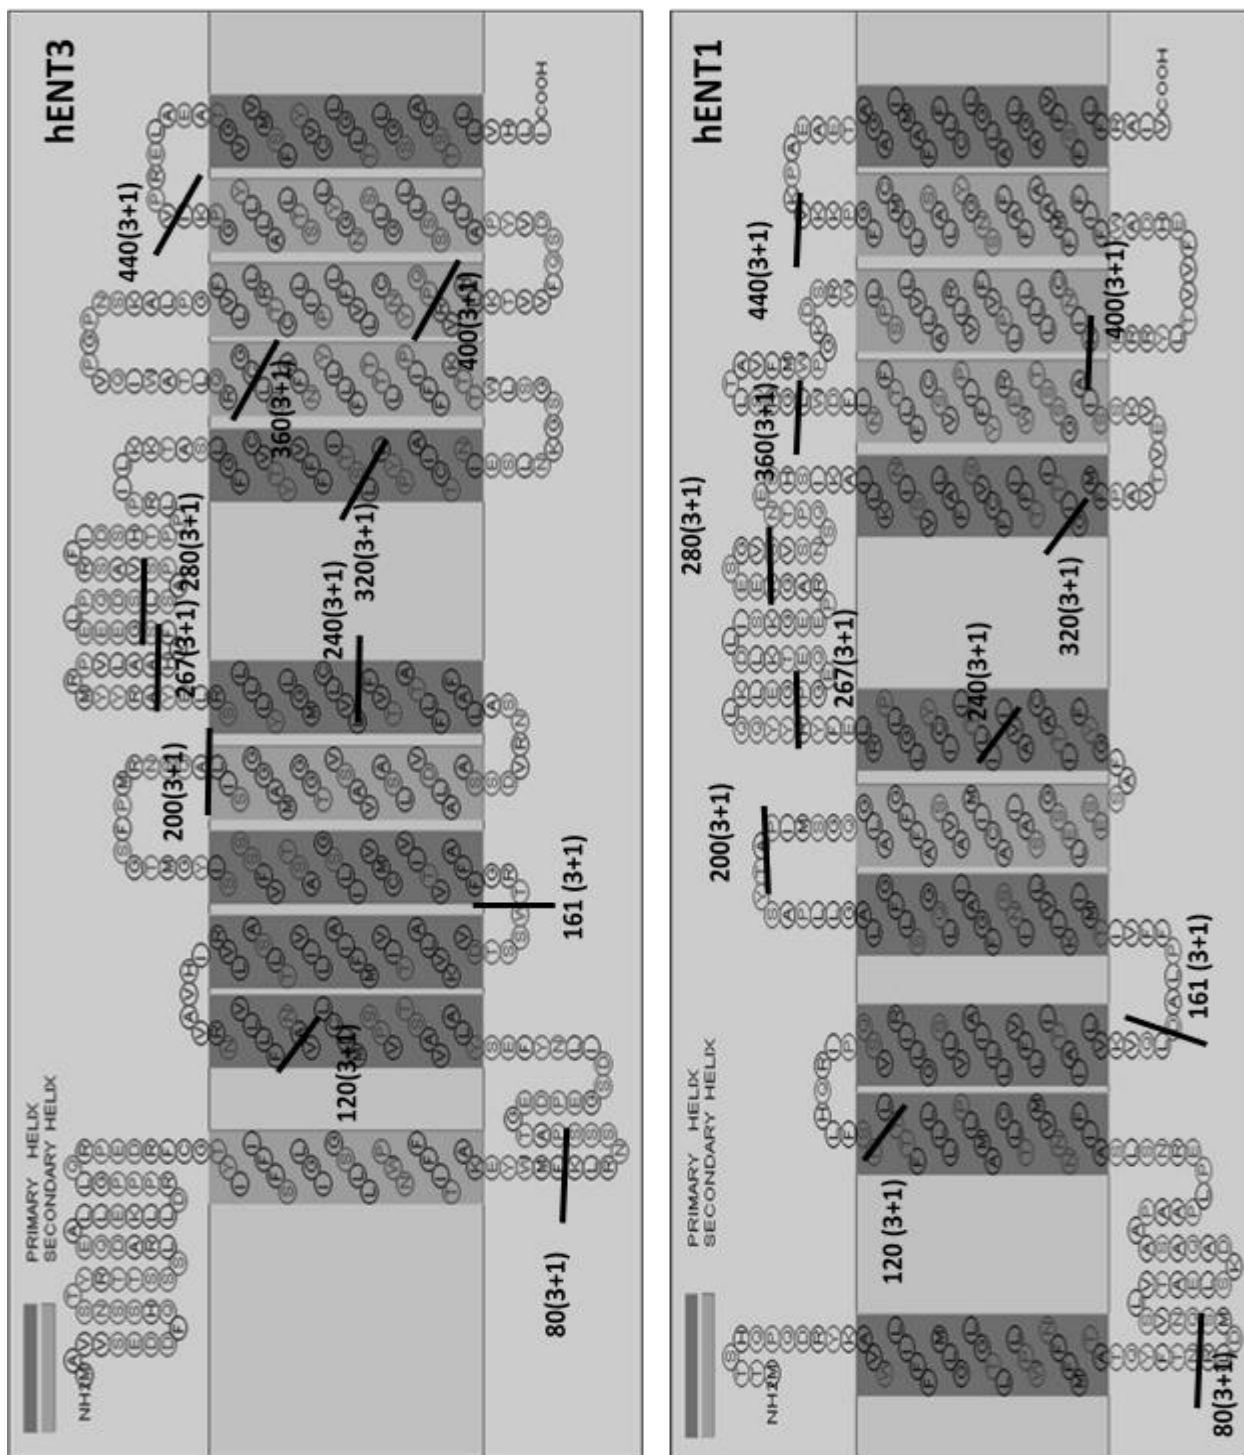

## **Supplemental Figure Legend**

**Supplemental Figure 1. Splice site positions of hENT3-hENT1 chimeras.** To make each chimera, the N-terminal parts were obtained from the N-terminal until the indicated splice sites of hENT3, and the C-terminal parts were obtained from the C-terminal beginning from the indicated splice sites of hENT1. The pasta sequence of hENT3 and hENT1 was obtained from the Uniprot server. The secondary structures were developed using the PredictProtein server (Columbia University).
